# Supplementary material
Source: HighWire-hosted journal article supplement (https://erj.ersjournals.com/content/58/3/2100229)
Supplement: inline-supplementary-material-1 [file inline-supplementary-material-1.pdf]

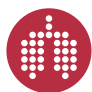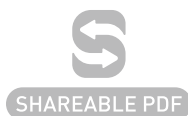

# Bronchodilator response in FOT parameters in middle-aged adults from SCAPIS: normal values and relationship to asthma and wheezing

Henrik Johansson <sup>1,2,3</sup>, Per Wollmer<sup>4</sup>, Johan Sundström<sup>5</sup>, Christer Janson <sup>2</sup> and Andrei Malinowski <sup>1</sup>

<sup>1</sup>Dept of Medical Sciences, Clinical Physiology, Uppsala University, Uppsala, Sweden. <sup>2</sup>Dept of Medical Sciences, Respiratory-, Allergy- and Sleep Research, Uppsala University, Uppsala, Sweden. <sup>3</sup>Dept of Neuroscience, Physiotherapy, Uppsala University, Uppsala, Sweden. <sup>4</sup>Dept of Translational Medicine, Clinical Physiology and Nuclear Medicine Unit, Lund University, Lund, Sweden. <sup>5</sup>Dept of Medical Sciences, Uppsala University, and Uppsala Clinical Research Center, Uppsala, Sweden.

Henrik Johansson ([henrik.johansson@neuro.uu.se](mailto:henrik.johansson@neuro.uu.se))

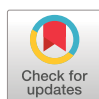

Shareable abstract (@ERSpublications)

**New estimated useful thresholds for the bronchodilator response in oscillometry parameters in healthy adults. These thresholds are lower than those proposed by recent guidelines.**  
<https://bit.ly/3xufqla>

**Cite this article as:** Johansson H, Wollmer P, Sundström J, *et al.* Bronchodilator response in FOT parameters in middle-aged adults from SCAPIS: normal values and relationship to asthma and wheezing. *Eur Respir J* 2021; 58: 2100229 [DOI: 10.1183/13993003.00229-2021].

This single-page version can be shared freely online.

Copyright ©The authors 2021. For reproduction rights and permissions contact [permissions@ersnet.org](mailto:permissions@ersnet.org)

Received: 20 Dec 2020  
Accepted: 22 April 2021

*To the Editor:*

Forced oscillation technique (FOT) is a measure of respiratory impedance first described by DuBois more than 60 years ago [1]. Respiratory impedance ( $Z_{rs}$ ) can be calculated by superimposing sound waves on normal tidal breathing without special breathing manoeuvres.

Copyright ©The authors 2021. For reproduction rights and permissions contact [permissions@ersnet.org](mailto:permissions@ersnet.org)
